# Supplementary material
Source: Springer Nature journal article supplement (https://www.springermedizin.de/resource/supplementary/12885_2012_3881_MOESM8_ESM.pdf/9464634)

Level of malignant transformation

overt disease

latent disease

Age

Time window for sympathetic NB precursor cells

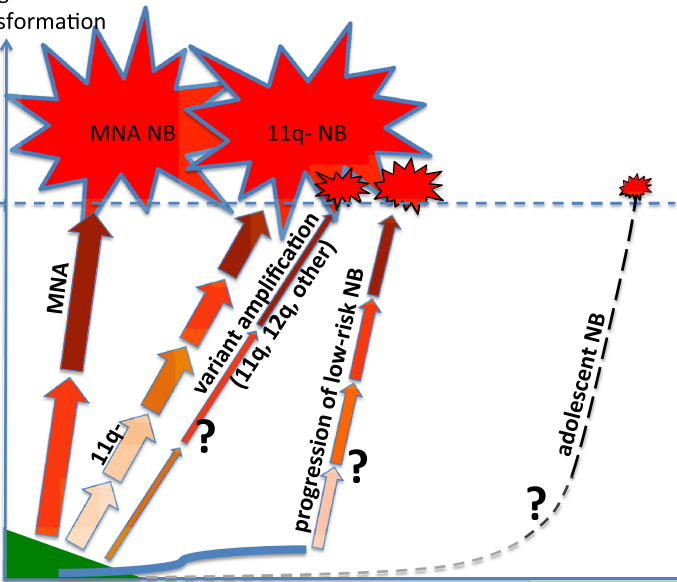

Supplement: MOESM8 [file 9464634]
